# Supplementary material for: Characterizing Families of Spectral Similarity Scores and Their Use Cases for Gas Chromatography–Mass Spectrometry Small Molecule Identification
Source: MDPI journal article supplement (doi:10.3390/metabo13101101), 2023-10-21
Supplement: s1 [file s1]

## Supporting Information for

### *Characterizing Families of Spectral Similarity Scores and Their Use Cases for Gas Chromatography–Mass Spectrometry Small Molecule Identification*

David J. Degnan <sup>1,†</sup>, Javier E. Flores <sup>1,†</sup>, Eva R. Brayfindley <sup>2</sup>, Vanessa L. Paurus <sup>3</sup>,  
Bobbie-Jo M. Webb-Robertson <sup>1</sup>, Chaevien S. Clendinen <sup>3</sup> and Lisa M. Bramer <sup>1,\*</sup>

1 Biological Sciences Division, Pacific Northwest National Laboratory, Richland, WA 99354, USA; david.degnan@pnnl.gov (D.J.D.); javier.flores@pnnl.gov (J.E.F.); bj@pnnl.gov (B.-J.M.W.-R.)

2 Artificial Intelligence and Data Analytics Division, Pacific Northwest National Laboratory, Richland, WA 99354, USA; eva.brayfindley@pnnl.gov

3 Environmental and Molecular Sciences Division, Pacific Northwest National Laboratory, Richland, WA 99354, USA; vanessa.paurus@pnnl.gov (V.L.P.); chaevien.clendinen@pnnl.gov (C.S.C.)

\* Correspondence: lisa.bramer@pnnl.gov

† These authors contributed equally to this work.

#### Table of Contents

|                  |                                                                                                                                                                                                                                                                                            |         |
|------------------|--------------------------------------------------------------------------------------------------------------------------------------------------------------------------------------------------------------------------------------------------------------------------------------------|---------|
| <b>Figure S1</b> | Heatmap of Pearson correlations measured between each pair of similarity metric, where each score is computed based on the max normalized data.                                                                                                                                            | Page S2 |
| <b>Table S1</b>  | The tested 66 metrics with their cluster number, their overlap score, their respective family, range, and formula.                                                                                                                                                                         | Page S3 |
| <b>Table S2</b>  | Average values for each of the three most important factors in predicting cluster membership for the max scaled dataset.                                                                                                                                                                   | Page S7 |
| <b>Figure S2</b> | Proportion of true positives (left) or true negatives (right) with Canberra Metric score (red), Cosine Correlation (green), or NIST Stein Scott Similarity (blue) score above the indicated threshold, relative to the combined total of true positives and negatives above the threshold. | Page S8 |

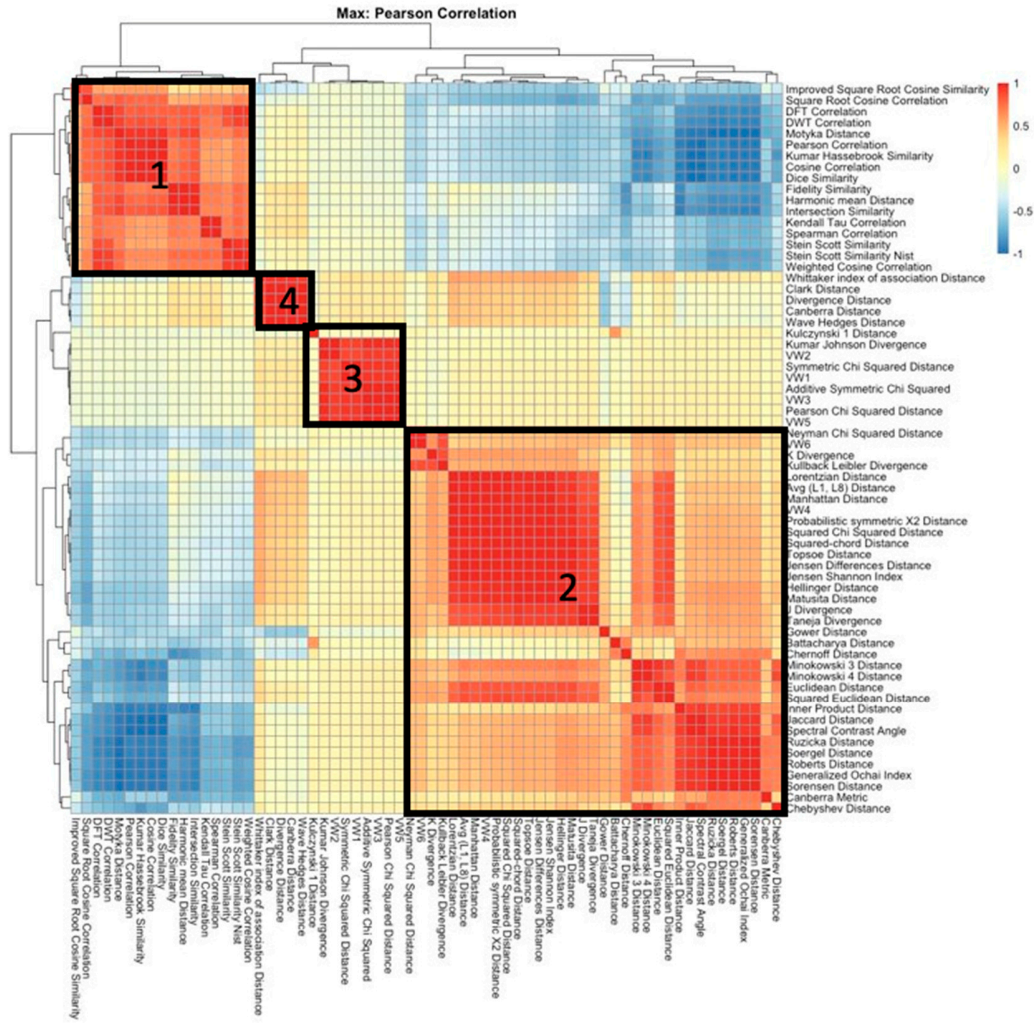

**Figure S1.** Heatmap of Pearson correlations measured between each pair of similarity metric, where each score is computed based on the max normalized data. Numbered boxes denote clusters of high positively-correlated metrics. The metrics within these clusters are the same as in the sum normalized data.

**Table S1.** The tested 66 metrics with their cluster number, their overlap score, their respective family, and formula. In the formula, for a given metabolite spectra, let  $X$  and  $Y$  denote vectors, of length  $N$ , representing m/z peak locations and peak intensities, respectively. Then,  $x_i$  denotes the m/z location and  $y_i$  denotes the peak intensity for the  $i^{th}$  peak for the reference spectrum and  $i = 1, 2, \dots, N$ . Similarly, let  $U$  and  $V$  denote vectors, of length  $N$ , representing m/z peak locations and peak intensities for a query spectrum. Thus,  $u_i$  denotes the observed m/z peak location for the  $i^{th}$  peak of the query spectrum, such that  $|x_i - u_i| \leq 0.5$ , and  $v_i$  denotes the observed peak intensity for the  $i^{th}$  peak. For brevity, we define  $\Sigma_i = \Sigma_{i=1}^N$

| Metric Name                     | Cluster | Overlap Score | T-Statistic | Family / Range           | Formula                                                                                                                                                                                                                                                                                                                                                                                                                                                                                                                                                                     |
|---------------------------------|---------|---------------|-------------|--------------------------|-----------------------------------------------------------------------------------------------------------------------------------------------------------------------------------------------------------------------------------------------------------------------------------------------------------------------------------------------------------------------------------------------------------------------------------------------------------------------------------------------------------------------------------------------------------------------------|
| Stein Scott Similarity NIST [8] | 1       | 0.01201       | 560         | Inner Product / [0,1]    | $\frac{[\Sigma_i I(v_i \neq 0)]S_{wc} + [\Sigma_i I(v_i \neq 0)I(y_i \neq 0)]S_r}{\Sigma_i I(v_i \neq 0) + \Sigma_i I(v_i \neq 0)I(y_i \neq 0)}$ $S_r = \frac{\Sigma_{\{i v_i \neq 0, y_i \neq 0\}} \left( \frac{y_i}{y_{i-1}} * \frac{v_{i-1}}{v_i} \right)^n}{\Sigma_i I(v_i \neq 0)I(y_i \neq 0)}$ $n = \begin{cases} 1 & \text{if } \left( \frac{y_i}{y_{i-1}} * \frac{v_{i-1}}{v_i} \right) < 1 \\ -1 & \text{if } \left( \frac{y_i}{y_{i-1}} * \frac{v_{i-1}}{v_i} \right) \geq 1 \end{cases}$ $S_{wc} \text{ is Weighted Cosine Correlation with } a = 0.5, b = 1.3$ |
| Stein Scott Similarity [10]     | 1       | 0.01298       | 515         | Inner Product / [0, 1]   | $\frac{[\Sigma_i I(v_i \neq 0)]S_{wc} + [\Sigma_i I(v_i \neq 0)I(y_i \neq 0)]S_r}{\Sigma_i I(v_i \neq 0) + \Sigma_i I(v_i \neq 0)I(y_i \neq 0)}$ $S_r = \frac{\Sigma_{\{i v_i \neq 0, y_i \neq 0\}} \left( \frac{y_i}{y_{i-1}} * \frac{v_{i-1}}{v_i} \right)^n}{\Sigma_i I(v_i \neq 0)I(y_i \neq 0)}$ $n = \begin{cases} 1 & \text{if } \left( \frac{y_i}{y_{i-1}} * \frac{v_{i-1}}{v_i} \right) < 1 \\ -1 & \text{if } \left( \frac{y_i}{y_{i-1}} * \frac{v_{i-1}}{v_i} \right) \geq 1 \end{cases}$ $S_{wc} \text{ is Weighted Cosine Correlation with } a = 0.6, b = 3$   |
| DFT Correlation                 | 1       | 0.01305       | 579         | Inner Product / [-1, 1]  | $\frac{N_V S_W(y_p, v_p) + N_{V\Delta Y} S_{DFT}(y_p, v_p)}{N_V + N_{V\Delta Y}}$ $S_{DFT}(y_p, v_p) = \frac{\Sigma_P y_{DFT} v_{DFT}}{(\Sigma_P y_{DFT}^2)^{1/2} (\Sigma_P v_{DFT}^2)^{1/2}}$                                                                                                                                                                                                                                                                                                                                                                              |
| Harmonic Mean Distance          | 1       | 0.01327       | 529         | Inner Product / [0, Inf) | $2 \sum_i \frac{y_i v_i}{y_i + v_i}$                                                                                                                                                                                                                                                                                                                                                                                                                                                                                                                                        |
| Intersection Similarity         | 1       | 0.01364       | 457         | Intersection [0, Inf)    | $\sum_i \min\{y_i, v_i\}$                                                                                                                                                                                                                                                                                                                                                                                                                                                                                                                                                   |
| Motyka Distance                 | 1       | 0.01364       | 457         | Intersection / [0, 0.5]  | $\frac{\sum_i \min\{y_i, v_i\}}{\sum_i (y_i + v_i)}$                                                                                                                                                                                                                                                                                                                                                                                                                                                                                                                        |
| DWT Correlation                 | 1       | 0.01394       | 565         | Inner Product / [-1, 1]  | $\frac{N_V S_W(y_p, v_p) + N_{V\Delta Y} S_{DWT}(y_p, v_p)}{N_V + N_{V\Delta Y}}$ $S_{DWT}(y_p, v_p) = \frac{\Sigma_P y_{DWT} v_{DWT}}{(\Sigma_P y_{DWT}^2)^{1/2} (\Sigma_P v_{DWT}^2)^{1/2}}$                                                                                                                                                                                                                                                                                                                                                                              |
| Fidelity Similarity             | 1       | 0.01394       | 549         | Fidelity / [0, Inf)      | $\sum_i \sqrt{y_i v_i}$                                                                                                                                                                                                                                                                                                                                                                                                                                                                                                                                                     |
| Square Root Cosine Correlation  | 1       | 0.01394       | 549         | Inner Product / [0, 1]   | $\frac{\sqrt{\sum_i y_i v_i}}{\sum_i y_i \sum_i v_i}$                                                                                                                                                                                                                                                                                                                                                                                                                                                                                                                       |

|                                              |   |         |      |                                |                                                                                                                                          |
|----------------------------------------------|---|---------|------|--------------------------------|------------------------------------------------------------------------------------------------------------------------------------------|
| Weighted Cosine Correlation                  | 1 | 0.01439 | 557  | Inner Product /<br>[0, 1]      | $S_{wc} = \frac{\sum_i (x_i^a y_i^b)(u_i^a v_i^b)}{(\sum_i (x_i^a y_i^b)^2)^{1/2} (\sum_i (u_i^a v_i^b)^2)^{1/2}}$                       |
| Kendall Tau Correlation                      | 1 | 0.02262 | 386  | Correlative /<br>[-1, 1]       | $\frac{2}{N(N-1)} \sum_{i < j} \text{sgn}(y_i - y_j) \text{sgn}(v_i - v_j)$                                                              |
| Spearman Correlation                         | 1 | 0.02269 | 409  | Correlative /<br>[-1, 1]       | Pearson correlation computed on ranked vectors                                                                                           |
| Dice Similarity                              | 1 | 0.02410 | 499  | Inner Product /<br>[0, 1]      | $\frac{2 \sum_i y_i v_i}{\sum_i y_i^2 + \sum_i v_i^2}$                                                                                   |
| Kumar Hassebrook Similarity                  | 1 | 0.02410 | 424  | Inner Product /<br>[0, 1]      | $\frac{\sum_i y_i v_i}{\sum_i y_i^2 + \sum_i v_i^2 - \sum_i y_i v_i}$                                                                    |
| Cosine Correlation                           | 1 | 0.02477 | 512  | Inner Product /<br>[0, 1]      | $\frac{\sum_i y_i v_i}{(\sum_i y_i^2)^{1/2} (\sum_i v_i^2)^{1/2}}$                                                                       |
| Pearson Correlation                          | 1 | 0.02499 | 513  | Correlative /<br>[-1, 1]       | $\frac{\sum_i (y_i - \bar{y})(v_i - \bar{v})}{\sqrt{\sum_i (y_i - \bar{y})^2 \sum_i (v_i - \bar{v})^2}}$                                 |
| Improved Square Root Cosine Similarity       | 1 | 0.09039 | 150  | Inner Product /<br>[0, 1]      | $\frac{\sqrt{\sum_i y_i v_i}}{\sqrt{\sum_i y_i} * \sqrt{\sum_i v_i}}$                                                                    |
| VW4                                          | 2 | 0.01312 | -509 | Vicis Wave Hedges/<br>[0, Inf) | $\sum_i \frac{(y_i - v_i)^2}{\max(y_i, v_i)}$                                                                                            |
| Probabilistic Symmetric Chi-Squared Distance | 2 | 0.01327 | -529 | Chi Squared /<br>[0, Inf)      | $2 \sum_i \frac{(y_i - v_i)^2}{y_i + v_i}$                                                                                               |
| Squared Chi Squared Distance                 | 2 | 0.01327 | -529 | Chi Squared /<br>[0, Inf)      | $\sum_i \frac{(y_i - v_i)^2}{y_i + v_i}$                                                                                                 |
| Jensen Differences Distance                  | 2 | 0.01350 | -540 | Shannon's Entropy/<br>[0, Inf) | $\sum_i \left[ \frac{y_i \ln y_i + v_i \ln v_i}{2} - \left( \frac{y_i + v_i}{2} \right) \ln \left( \frac{y_i + v_i}{2} \right) \right]$  |
| Jensen Shannon Index                         | 2 | 0.01350 | -540 | Shannon's Entropy/<br>[0, Inf) | $\frac{1}{2} \left[ \sum_i y_i \ln \left( \frac{2y_i}{y_i + v_i} \right) + \sum_i v_i \ln \left( \frac{2v_i}{y_i + v_i} \right) \right]$ |
| K Divergence                                 | 2 | 0.01350 | -499 | Shannon's Entropy/<br>[0, Inf) | $\sum_i v_i \ln \left( \frac{2v_i}{y_i + v_i} \right)$                                                                                   |
| Topsoe Distance                              | 2 | 0.01350 | -540 | Shannon's Entropy/<br>[0, Inf) | $\sum_i \left[ y_i \ln \left( \frac{2y_i}{y_i + v_i} \right) + v_i \ln \left( \frac{2v_i}{y_i + v_i} \right) \right]$                    |
| Generalized Ochai Index                      | 2 | 0.01364 | -457 | Inner Product /<br>[0, 1]      | $1 - \frac{\sum_i \min\{y_i, v_i\}}{\sqrt{\sum_i y_i \sum_i v_i}}$                                                                       |
| Kulczynski 1 Distance                        | 2 | 0.01364 | -25  | L1 Distance /<br>[0, Inf)      | $\frac{\sum_i  y_i - v_i }{\sum_i \min\{y_i, v_i\}}$                                                                                     |
| Manhattan Distance                           | 2 | 0.01364 | -457 | LP Distance /<br>[0, Inf)      | $\sum_i  y_i - v_i $                                                                                                                     |
| Ruzicka Distance                             | 2 | 0.01364 | -373 | L1 Distance /<br>[0, 1]        | $1 - \frac{\sum_i  y_i - v_i }{\sum_i \max\{y_i, v_i\}}$                                                                                 |
| Soergel Distance                             | 2 | 0.01364 | -373 | L1 Distance /<br>[0, 1]        | $\frac{\sum_i  y_i - v_i }{\sum_i \max\{y_i, v_i\}}$                                                                                     |
| Sorensen Distance                            | 2 | 0.01364 | -457 | LP Distance /<br>[0, 1]        | $\frac{\sum_i  y_i - v_i }{\sum_i (y_i + v_i)}$                                                                                          |
| Battacharya Distance                         | 2 | 0.01394 | -409 | Fidelity /<br>(-Inf, Inf)      | $-\ln \left( \sum_i \sqrt{y_i v_i} \right)$                                                                                              |

|                             |   |         |      |                                |                                                                                                                 |
|-----------------------------|---|---------|------|--------------------------------|-----------------------------------------------------------------------------------------------------------------|
| Hellinger Distance          | 2 | 0.01394 | -425 | Fidelity /<br>[0, Inf)         | $\sqrt{2 \sum_i (\sqrt{y_i} - \sqrt{v_i})^2}$                                                                   |
| Matusita Distance           | 2 | 0.01394 | -425 | Fidelity /<br>[0, Inf)         | $\sqrt{\sum_i (\sqrt{y_i} - \sqrt{v_i})^2}$                                                                     |
| Squared-Chord Distance      | 2 | 0.01394 | -549 | Fidelity /<br>[0, Inf)         | $\sum_i (\sqrt{y_i} - \sqrt{v_i})^2$                                                                            |
| Lorentzian Distance         | 2 | 0.01401 | -456 | L1 Distance /<br>[0, Inf)      | $\sum_i \ln(1 +  y_i - v_i )$                                                                                   |
| Roberts Distance            | 2 | 0.01490 | -398 | L1 Distance /<br>[0, 1]        | $1 - \sum_i \frac{(v_i + y_i) * \frac{\min(v_i, y_i)}{\max(v_i, y_i)}}{(v_i + y_i)}$                            |
| Avg (L1, L8) Distance       | 2 | 0.01609 | -433 | Combination /<br>[0, Inf)      | $\frac{1}{2} \sum_i [ y_i - v_i  + \max_i\{ y_i - v_i \}]$                                                      |
| J Divergence                | 2 | 0.01958 | -533 | Shannon's Entropy/<br>[0, Inf) | $\sum_i (y_i - v_i) \ln\left(\frac{v_i}{y_i}\right)$                                                            |
| Taneja Divergence           | 2 | 0.01987 | -532 | Combination /<br>[0, Inf)      | $\sum_i \left[ \left( \frac{y_i + v_i}{2} \right) \ln \left( \frac{y_i + v_i}{2\sqrt{y_i v_i}} \right) \right]$ |
| Jaccard Distance            | 2 | 0.02410 | -424 | Inner Product /<br>[0, 1]      | $\sum_i \frac{(v_i - y_i)^2}{v_i^2 + y_i^2 - v_i y_i}$                                                          |
| Spectral Contrast Angle     | 2 | 0.02477 | -419 | Inner Product /<br>[0, Inf)    | $\arccos\left(\frac{\sum_i y_i v_i}{\sqrt{\sum_i y_i^2 \sum_i v_i^2}}\right)$                                   |
| Chernoff Distance           | 2 | 0.02551 | -460 | Fidelity /<br>(-Inf, Inf)      | $\max\left(-\log\left(\sum_i (v_i^{0.1} * y_i^{0.9})^{0.9}\right)\right)$                                       |
| Kullback-Leibler Divergence | 2 | 0.02833 | -590 | Shannon's Entropy/<br>[0, Inf) | $\sum_i v_i \ln\left(\frac{v_i}{y_i}\right)$                                                                    |
| VW6                         | 2 | 0.03062 | -405 | Vicis Wave Hedges/<br>[0, Inf) | $\min\left(\sum_i \frac{(y_i - v_i)^2}{y_i}, \sum_i \frac{(y_i - v_i)^2}{v_i}\right)$                           |
| Neyman Chi Squared Distance | 2 | 0.03077 | -304 | Chi Squared /<br>[0, Inf)      | $\sum_i \frac{(y_i - v_i)^2}{y_i}$                                                                              |
| Canberra Metric             | 2 | 0.03915 | -219 | L1 Distance /<br>[0, 1]        | $\frac{1}{\sum_i I(v_i \neq 0)} \sum_i \frac{ y_i - v_i }{(y_i + v_i)}$                                         |
| Inner Product Distance      | 2 | 0.03945 | -157 | Inner Product /<br>(-Inf, 1]   | $1 - \sum_i v_i y_i$                                                                                            |
| Euclidean Distance          | 2 | 0.04175 | -33  | LP Distance /<br>[0, Inf)      | $\sqrt{\sum_i  y_i - v_i ^2}$                                                                                   |
| Squared Euclidean Distance  | 2 | 0.04175 | -346 | Chi Squared /<br>[0, Inf)      | $\sum_i  y_i - v_i ^2$                                                                                          |
| Minkowski 3 Distance        | 2 | 0.05613 | -312 | LP Distance /<br>[0, Inf)      | $\sqrt[3]{\sum_i  y_i - v_i ^3}$                                                                                |
| Minkowski 4 Distance        | 2 | 0.06829 | -301 | LP Distance /<br>[0, Inf)      | $\sqrt[4]{\sum_i  y_i - v_i ^4}$                                                                                |
| Chebyshev Distance          | 2 | 0.08639 | -286 | LP Distance /<br>[0, 1]        | $\max_i\{ y_i - v_i \}$                                                                                         |

|                                            |   |         |      |                                |                                                                            |
|--------------------------------------------|---|---------|------|--------------------------------|----------------------------------------------------------------------------|
| Gower Distance                             | 2 | 0.09929 | -276 | L1 Distance /<br>[0, Inf)      | $\frac{1}{N} \sum_i  y_i - v_i $                                           |
| Additive Symmetric Chi Squared             | 3 | 0.09180 | -53  | Chi Squared /<br>[0, Inf)      | $\sum_i \frac{(y_i - v_i)^2 (y_i + v_i)}{y_i v_i}$                         |
| VW3                                        | 3 | 0.09180 | -53  | Vicis Wave Hedges/<br>[0, Inf) | $\sum_i \frac{(y_i - v_i)^2}{\min(y_i, v_i)}$                              |
| Pearson Chi Squared Distance               | 3 | 0.09269 | -52  | Chi Squared /<br>[0, Inf)      | $\sum_i \frac{(y_i - v_i)^2}{v_i}$                                         |
| VW5                                        | 3 | 0.09269 | -52  | Vicis Wave Hedges/<br>[0, Inf) | $\max(\sum_i \frac{(y_i - v_i)^2}{y_i}, \sum_i \frac{(y_i - v_i)^2}{v_i})$ |
| Kumar Johnson Divergence                   | 3 | 0.11664 | -28  | Shannon's Entropy/<br>[0, Inf) | $\sum_i \left( \frac{(y_i^2 - v_i^2)^2}{2(y_i v_i)^{3/2}} \right)$         |
| Symmetric Chi Squared Distance             | 3 | 0.19042 | -64  | Chi Squared /<br>[0, Inf)      | $\sum_i \frac{(y_i - v_i)^2}{y_i v_i}$                                     |
| VW1                                        | 3 | 0.19042 | -64  | Vicis Wave Hedges/<br>[0, Inf) | $\sum_i \frac{ y_i - v_i }{\min(y_i, v_i)}$                                |
| VW2                                        | 3 | 0.24403 | -12  | Vicis Wave Hedges/<br>[0, Inf) | $\sum_i \frac{(y_i - v_i)^2}{(\min(y_i, v_i))^2}$                          |
| Whittaker Index of Association<br>Distance | 4 | 0.07148 | -354 | Shannon's Entropy/<br>[0, Inf) | $\frac{1}{2} \sum_i \left  \frac{v_i}{n} - \frac{y_i}{n} \right $          |
| Clark Distance                             | 4 | 0.23491 | -111 | Chi Squared /<br>[0, Inf)      | $\sqrt{\sum_i \left( \frac{ y_i - v_i }{y_i + v_i} \right)^2}$             |
| Divergence Distance                        | 4 | 0.23491 | -108 | Chi Squared /<br>[0, Inf)      | $2 \sum_i \frac{(y_i - v_i)^2}{(y_i + v_i)^2}$                             |
| Canberra Distance                          | 4 | 0.25856 | -98  | L1 Distance /<br>[0, Inf)      | $\sum_i \frac{ y_i - v_i }{(y_i + v_i)}$                                   |
| Wave Hedges Distance                       | 4 | 0.26702 | -88  | Intersection /<br>[0, Inf)     | $\sum_i \frac{ y_i - v_i }{\max\{y_i, v_i\}}$                              |

[8] Hotea, I.; Sirbu, C.; Plotuna, A.M.; Tîrziu, E.; Badea, C.; Berbecea, A.; Dragomirescu, M.; Radulov, I. Integrating (Nutri-)Metabolomics into the One Health Tendency—The Key for Personalized Medicine Advancement. *Metabolites* **2023**, *13*, 800. <https://doi.org/10.3390/metabo13070800>.

[10] Koo, I.; Zhang, X.; Kim, S. Wavelet- and Fourier-transform-based spectrum similarity approaches to compound identification in gas chromatography/mass spectrometry. *Anal. Chem.* **2011**, *83*, 5631–5638. <https://doi.org/10.1021/ac200740w>.

**Table S2.** Table of the average values for each of the three most important factors in predicting cluster membership for the max scaled dataset.

| Cluster | t-Statistic | Overlap Score | Score Median          |
|---------|-------------|---------------|-----------------------|
| 1       | 408.187     | 0.028         | 0.240                 |
| 2       | -405.251    | 0.034         | $3.88 \times 10^{11}$ |
| 3       | -70.745     | 0.134         | $3.33 \times 10^{29}$ |
| 4       | -147.916    | 0.215         | 106.039               |

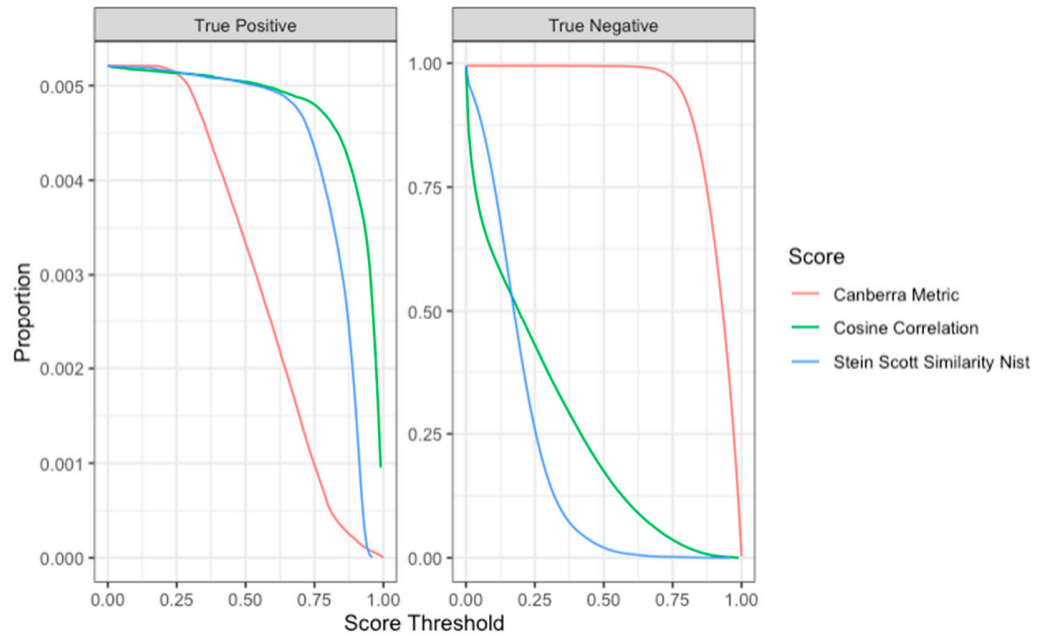

**Figure S2.** Proportions of true positives (left) and true negatives (right) among the combined total number of true positives and negatives above different values of score threshold. Trends in proportion are displayed for three scores: Canberra Metric (red), Cosine Correlation (green), and NIST Stein Scott Similarity (blue).
